# Supplementary material for: A Survey of Software Tool Utilization and Capabilities for Quantitative Systems Pharmacology: What We Have and What We Need
Source: PubMed Central journal article supplement — CPT Pharmacometrics Syst Pharmacol. 2019 Jan 30;8(2):62–76. doi: 10.1002/psp4.12373 (PMC6389347; doi:10.1002/psp4.12373), 2019-01-30

## Figures S1-S36

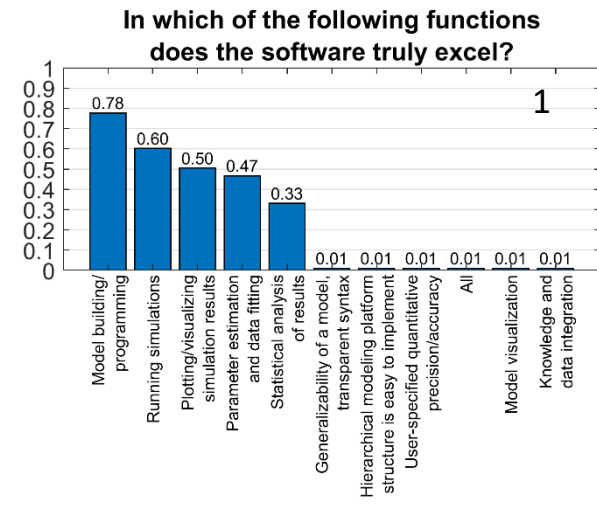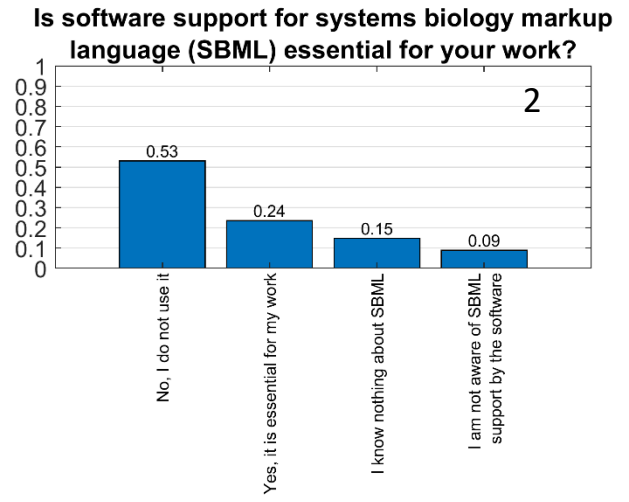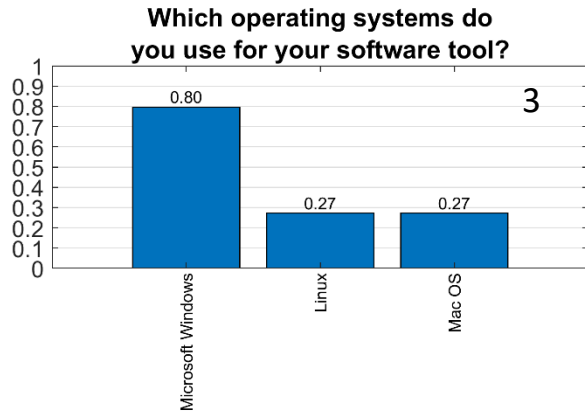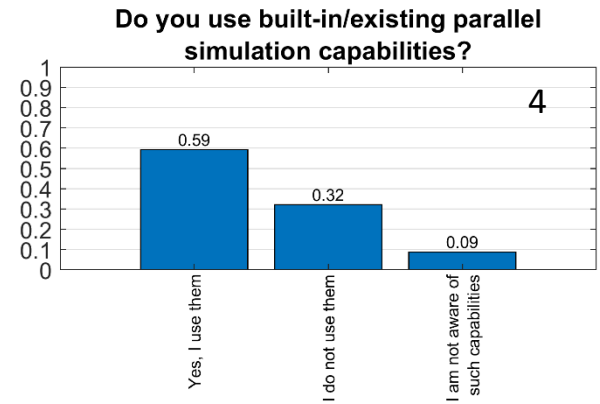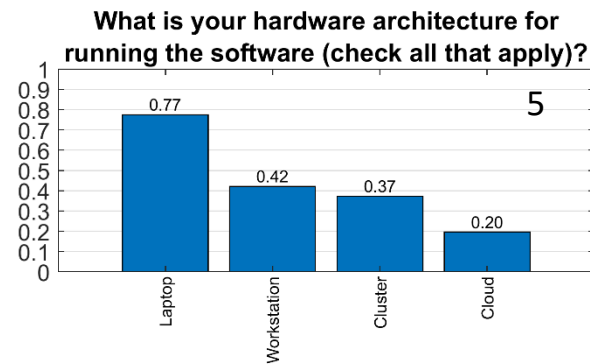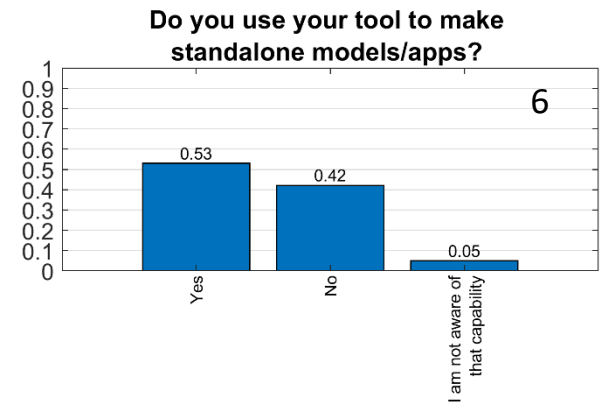

**Figures S1 – S36.** Results representing responses to the questions in Section 2. The number in the top right corner of each panel corresponds to the number of the figure, as it is referenced in the text, e.g. Fig. S4, and a question number in the Section 2 of the survey. Each panel shows a survey question at the top with results represented by a bar plot. The number at the top of each bar indicates the fraction of the total number of responses that selected that particular answer.

**Do you use software network/collaboration capabilities and version control within the tool to develop/run your models together with your colleagues?**

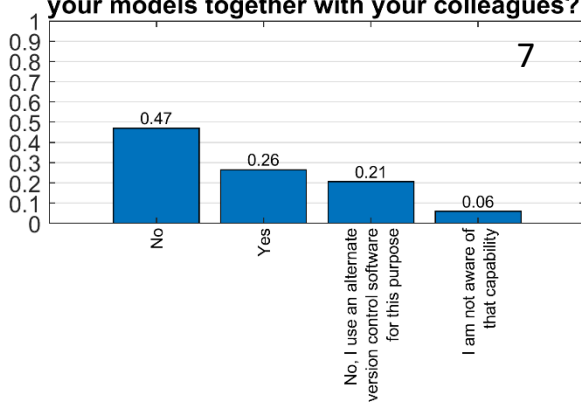

**What type(s) of software deployment and IT support is used in your organization (department/site)?**

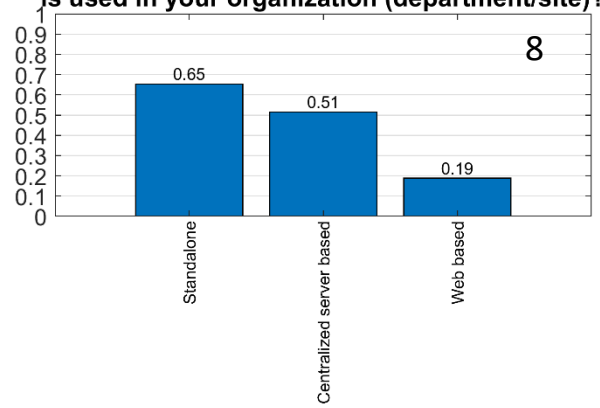

**What types of models deployment do you use with your software tool? (select all that apply)**

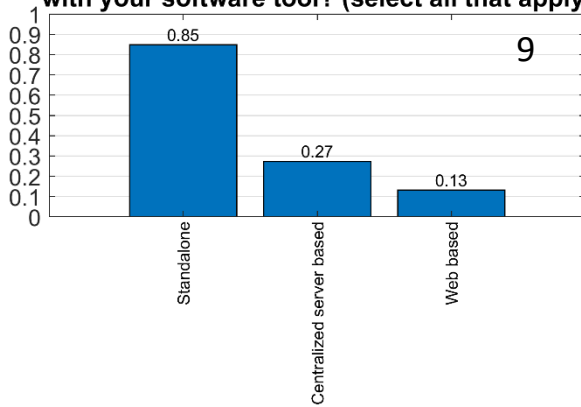

**Do you use software capabilities to export your models as a set of equations?**

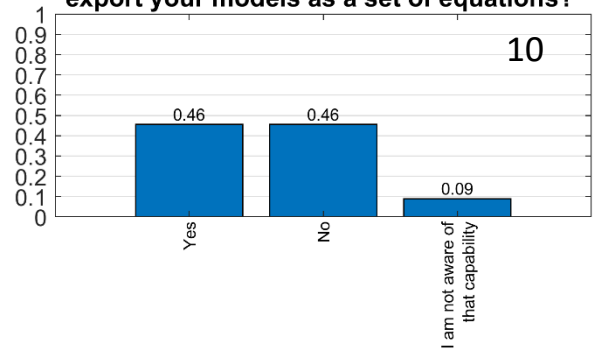

**What types of model do you develop/use with your software tool?**

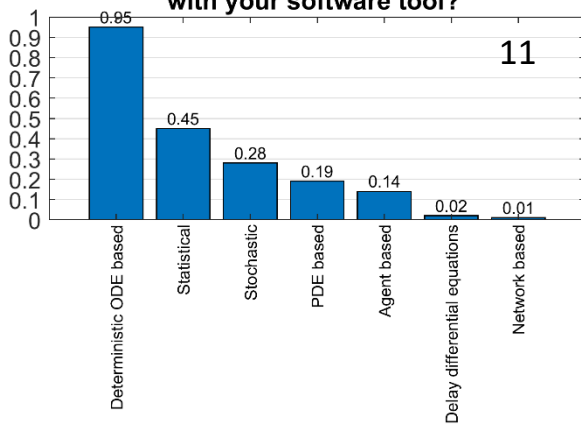

**Do you use a graphical user interface (GUI) for visual model design and quick prototyping?**

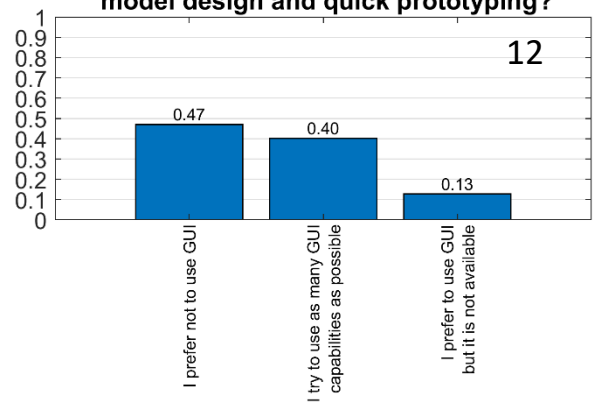

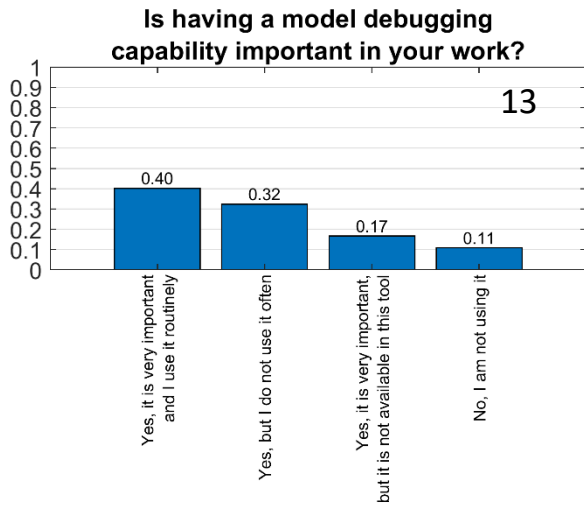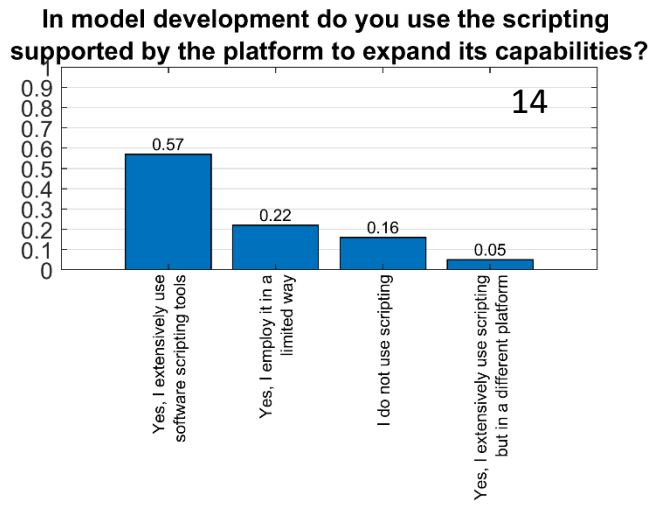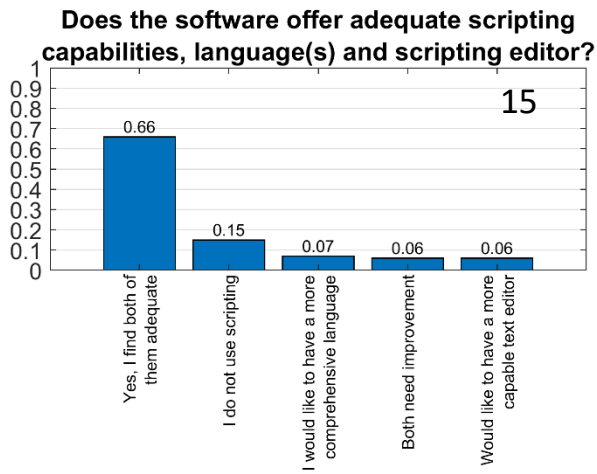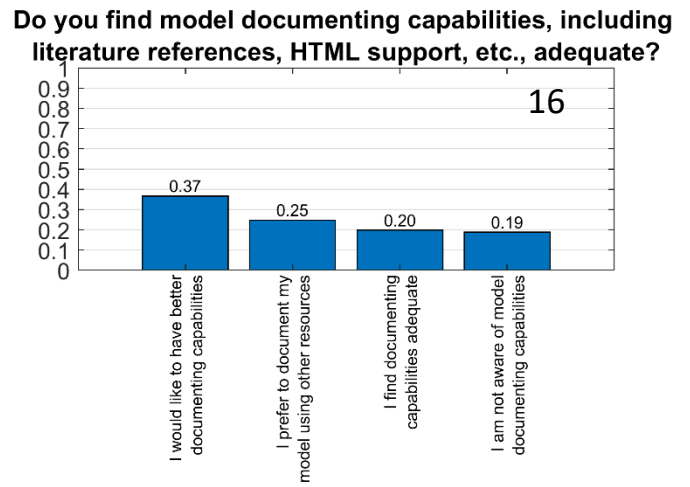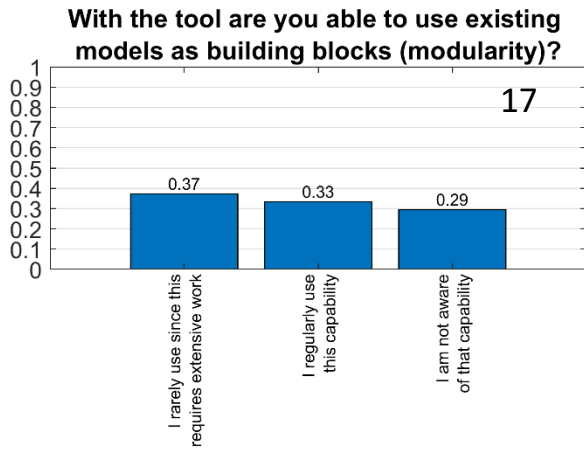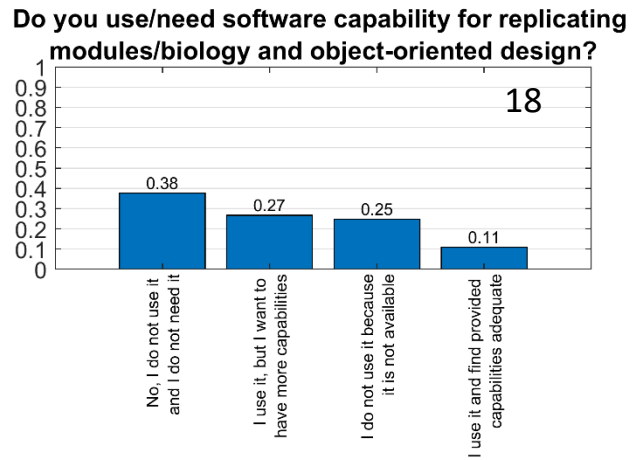

**Do you find parameters are organized, especially for larger models, convenient and easy to work with?**

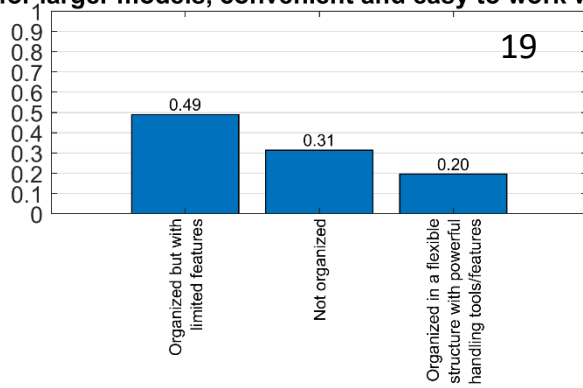

**Do you use parameter manipulation and parameter export/import to/from different software?**

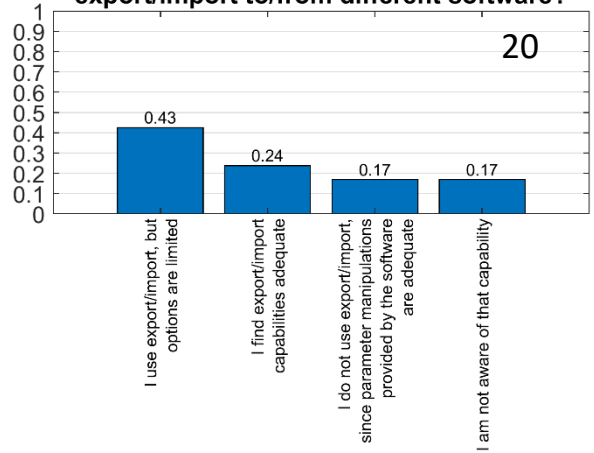

**Do you find parameter estimation capabilities provided by the software sufficient?**

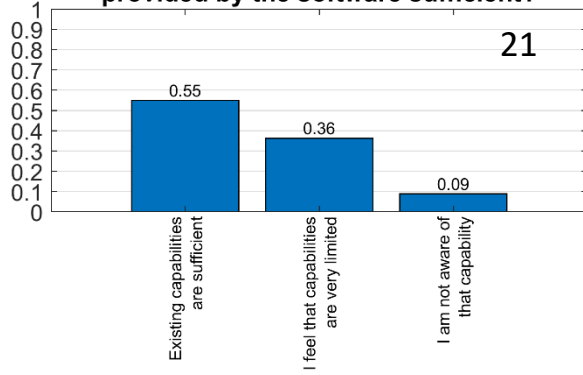

**Do you use the software for parameter sensitivity analysis?**

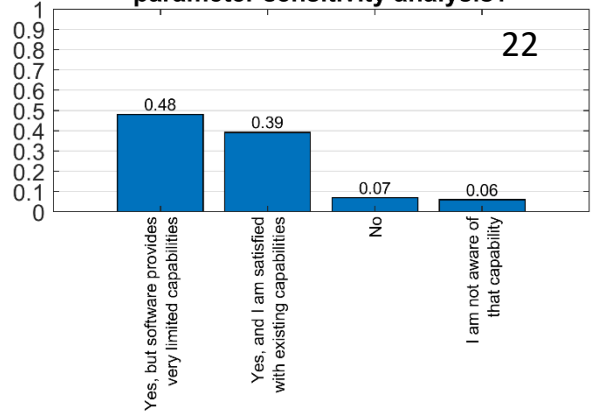

**What parameter estimation methods do you use most often?**

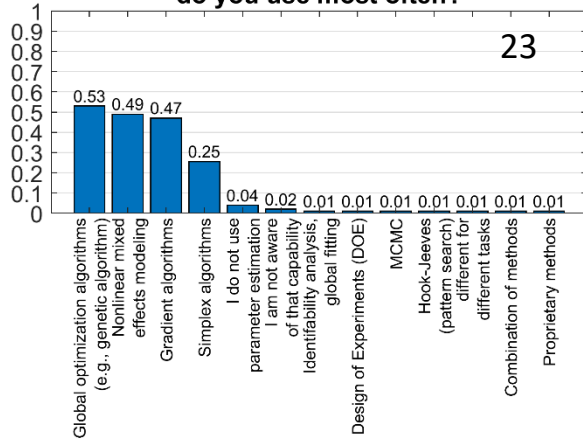

**What kind of data do you use with the software for parameter estimation and/or model qualification?**

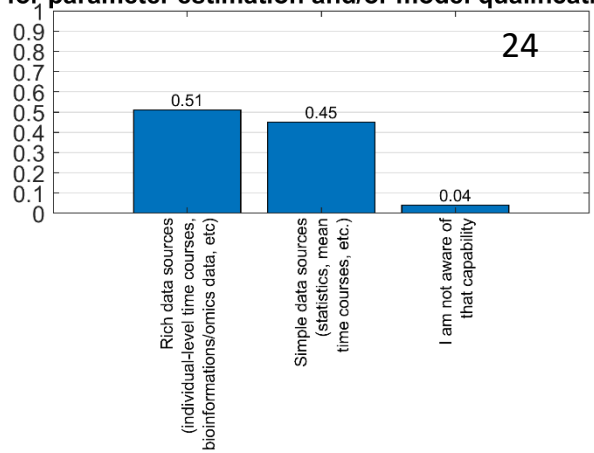

**Are the numerical solvers/algorithms provided by the software adequate for your work?**

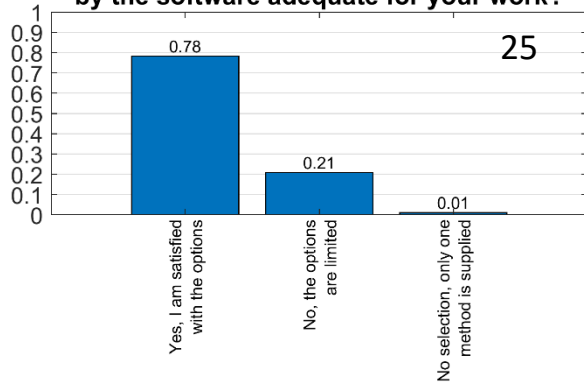

**If you want to add more solvers, which one would you select?**

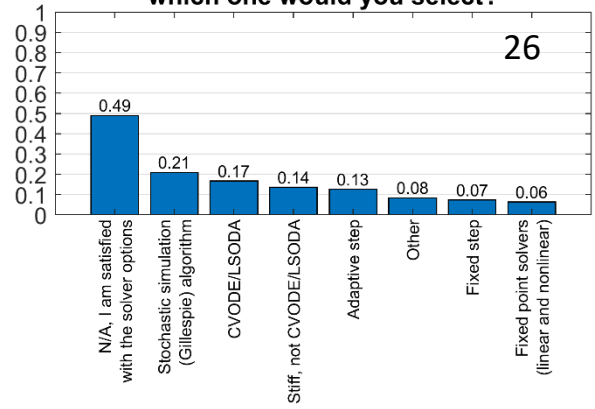

**With the software you use how is the speed/ease of plotting/presenting simulation results?**

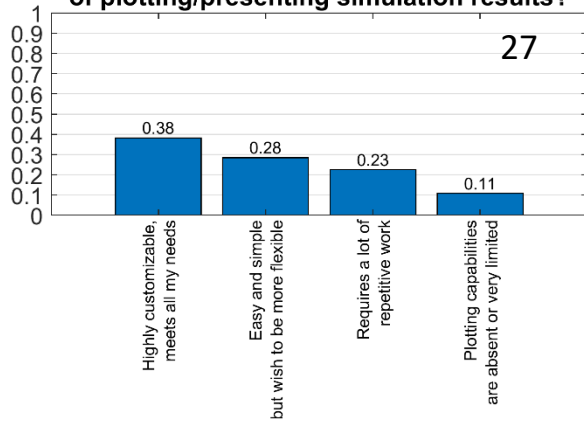

**What features of the software do you value most for data plotting/visualization?**

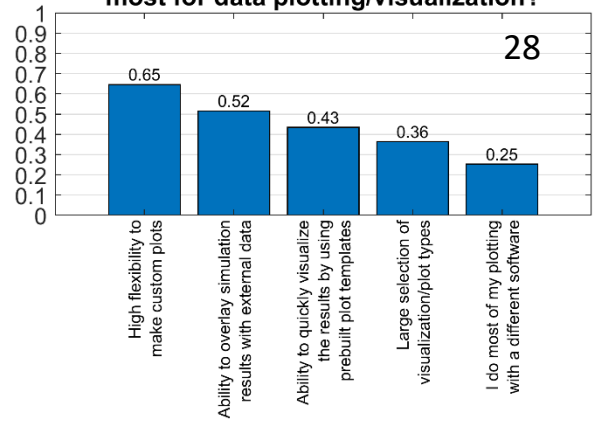

**Do you employ statistical analysis tools provided by the software?**

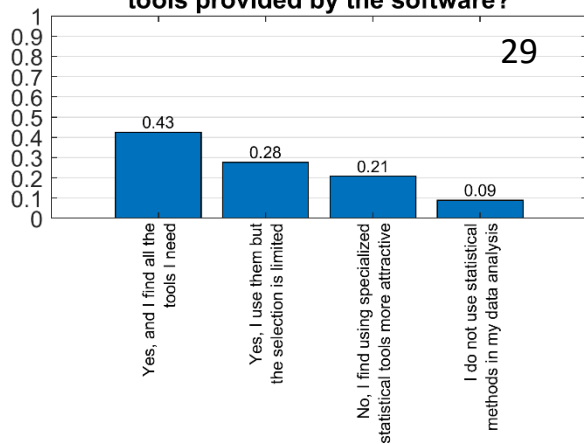

**Are capabilities to export simulation results into other formats for outside manipulation/analysis adequate?**

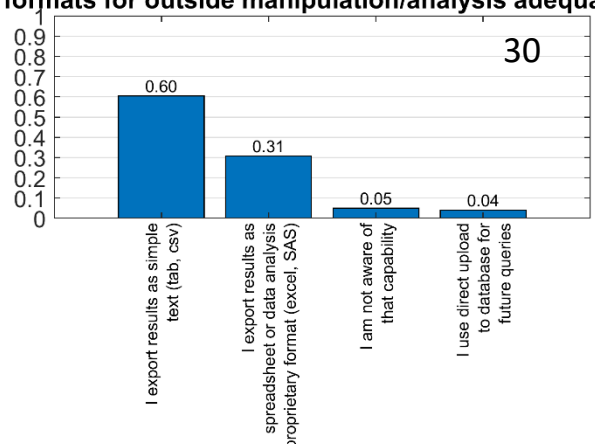

**Do you employ the software for creating VPs and VPop?**

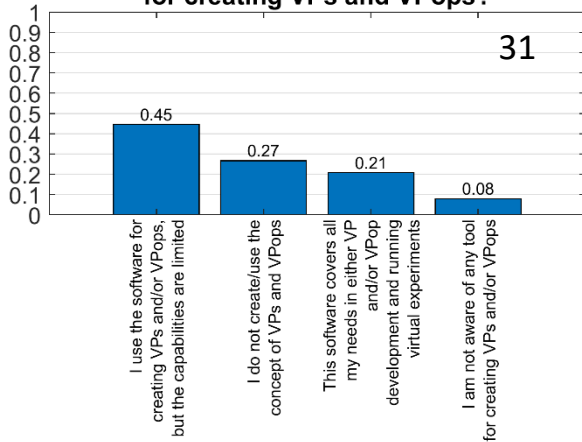

**Is the organization/structure of experiments, VPs, and VPop adequate and useful for running simulations with multiple experiments and/or VPs and VPop?**

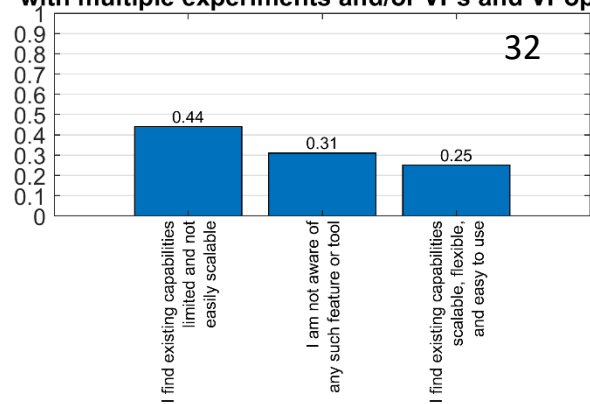

**Does the cost of the software ownership, including the cost of the license, add-on packages, and/or customer support and annual maintenance fees play an important/definitive role in your decision to use it?**

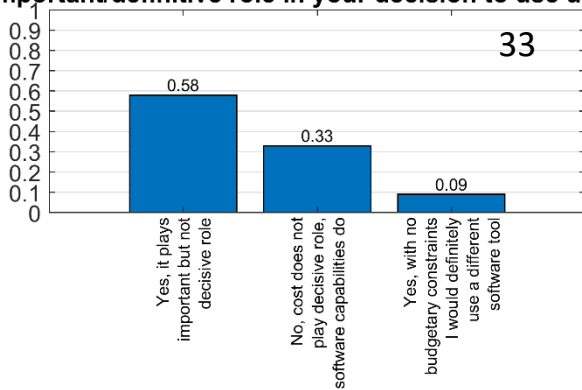

**Do you find the software customer support adequate and useful?**

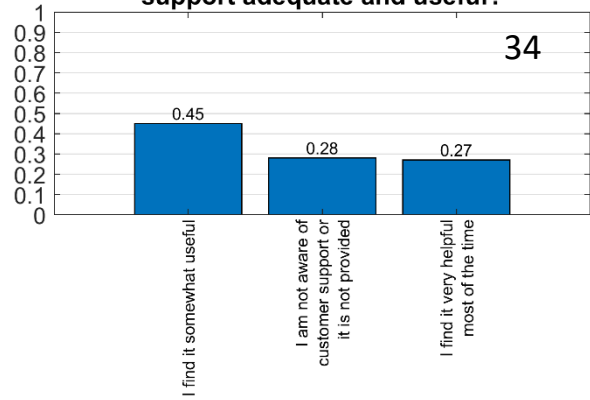

**What other sources of information about the software do you use?**

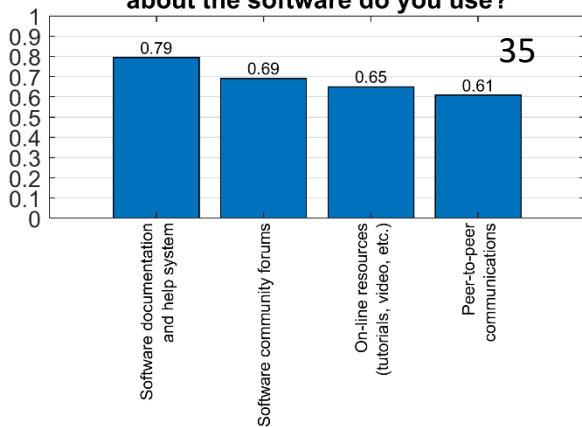

**Are you using existing QSP models/model platforms (including freely available) with your software?**

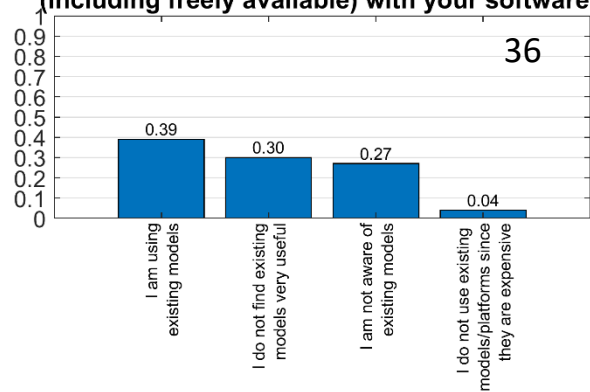

Supplement: PSP4-8-62-s002.pdf [file PSP4-8-62-s002.pdf]
