# Supplementary material for: A Survey of Software Tool Utilization and Capabilities for Quantitative Systems Pharmacology: What We Have and What We Need
Source: PubMed Central journal article supplement — CPT Pharmacometrics Syst Pharmacol. 2019 Jan 30;8(2):62–76. doi: 10.1002/psp4.12373 (PMC6389347; doi:10.1002/psp4.12373), 2019-01-30
Supplement: PSP4-8-62-s003.pdf [file PSP4-8-62-s003.pdf]

**Table S1.** Feature importance in QSP modeling software platform

| Feature                                                                                      | Rank |         |      | Mean |         |      | pval   |
|----------------------------------------------------------------------------------------------|------|---------|------|------|---------|------|--------|
|                                                                                              | All  | Low/Med | High | All  | Low/Med | High |        |
| 3.1 Ease of large model development (>20 state variable)                                     | 1    | 2       | 1    | 2.77 | 2.63    | 2.82 | 0.0843 |
| 3.6 Support for scripting tasks that extend the tool’s capabilities                          | 2    | 2       | 2    | 2.62 | 2.63    | 2.62 | 1      |
| 3.7 Support for multiple parameter estimation algorithms                                     | 3    | 1       | 3    | 2.59 | 2.68    | 2.56 | 0.8852 |
| 3.12 Built-in support for flexible visualization of simulation results                       | 4    | 4       | 3    | 2.57 | 2.58    | 2.56 | 0.1895 |
| 3.8 Handling a large number of parameters incl. export/import                                | 5    | 6       | 3    | 2.55 | 2.53    | 2.56 | 0.5774 |
| 3.4 Support for flexible hardware/software architecture (cluster, cloud, different OS)       | 6    | 6       | 6    | 2.36 | 2.53    | 2.30 | 0.2649 |
| 3.3 High-performance parallel computing enabled                                              | 7    | 4       | 8    | 2.35 | 2.58    | 2.26 | 0.3337 |
| 3.5 Availability of multiple numerical solvers                                               | 8    | 8       | 6    | 2.33 | 2.42    | 2.30 | 0.8377 |
| 3.2 Support for export to SBML or other language                                             | 9    | 8       | 11   | 2.26 | 2.42    | 2.20 | 0.4347 |
| 3.14 Support for VPop manipulation, sampling, and clinical trial simulation                  | 9    | 11      | 9    | 2.26 | 2.37    | 2.22 | 0.6377 |
| 3.13 Tools for Virtual Patients (VP) and Virtual Populations (VPops) creation                | 11   | 11      | 11   | 2.25 | 2.37    | 2.20 | 0.7226 |
| 3.11 Ease of creation of replicated features (e.g., array of cells, similar compounds, etc.) | 12   | 13      | 10   | 2.24 | 2.32    | 2.20 | 0.7702 |
| 3.15 Low cost of ownership and maintenance                                                   | 13   | 10      | 14   | 2.18 | 2.39    | 2.10 | 0.2553 |
| 3.16 Customer support                                                                        | 14   | 16      | 13   | 2.12 | 1.95    | 2.18 | 0.466  |
| 3.9 Visual diagrammatic model development capability (in contrast to purely textbased)       | 15   | 14      | 16   | 2.06 | 2.21    | 2.00 | 0.0191 |
| 3.10 Modular (plug-and-play) model architecture                                              | 16   | 15      | 15   | 2.01 | 2.00    | 2.02 | 0.7875 |
| 3.18 Integration with additional external tools, e.g., bioinformatics                        | 17   | 18      | 17   | 1.81 | 1.79    | 1.82 | 0.6744 |
| 3.17 Selection of available disease models/platforms for this particular software            | 18   | 16      | 18   | 1.67 | 1.95    | 1.56 | 0.0572 |

**Table S1.** Categorical breakdown of feature importance in a hypothetical QSP modeling software platform. The respondents were asked to place features into one of three categories by the order of importance and to assign a score as follows: 3 - Most important; 2 - Somewhat important; and 1 - Least important. The far right (“Mean”) section of the table presents combined average scores given by the respondents (All) as well as between groups of respondents based on their QSP experience: Low/Med 0-3 years of experience; High – more than 3 of experience. Based on the scores given by all respondents and each group separately, features are ranked as shown in the middle (“Rank”) section of the table. See text for additional information.
